# Supplementary material
Source: PubMed Central journal article supplement (PMC2777953)

## Supplementary material

**Figure S1. Expression levels of  $\beta_{2a}$  or  $\text{Ca}_v1.2$   $\text{Ca}^{2+}$ -channel subunits in hearts of transgenic animals.** **a**, Induction of the  $\beta_{2a}$ -subunit by tebufenozide treatment. mRNA copy number of endogenous murine  $\beta_2$ -subunit and overexpressed rat  $\beta_{2a}$ -subunit.  $\text{tg}_{\text{ind}} \beta_{2a}$  and double-transgenic mice showed approximately 100-fold overexpression of the  $\beta_2$ -subunit compared to wild-type and  $\text{tg} \text{Ca}_v1.2$  mice upon tebufenozide treatment (n=5-15 per genotype, \*\*\*p<0.001). **b**, Overexpression of human  $\text{Ca}_v1.2$ -subunit. No differences were observed in mRNA expression levels between  $\text{tg} \text{Ca}_v1.2$  and  $\text{tg} \text{Ca}_v1.2 \times \text{tg}_{\text{ind}} \beta_{2a}$  mice (n=8-9 per genotype).

**Figure S2: Gating of single ventricular L-type  $\text{Ca}^{2+}$ -channels at +20 mV.** At this more depolarized test potential the lower basal activity in myocytes from  $\text{tg} \text{Ca}_v1.2$  is confirmed. In accordance with the leftward shift at the whole-cell level (Figure 1), effects of  $\beta_{2a}$  overexpression on single-channel gating are less pronounced at +20 mV compared to +10 mV (cf. Figure 2) (wild-type: n=8,  $\text{tg}_{\text{ind}} \beta_{2a}$ : n=7,  $\text{tg} \text{Ca}_v1.2$ : n=6,  $\text{tg} \text{Ca}_v1.2 \times \text{tg}_{\text{ind}} \beta_{2a}$ : n=8, \* p<0.05; \*\* p<0.01).

**Figure S3: Effects of cAMP-stimulation on  $\text{Ca}^{2+}$  currents in ventricles overexpressing a  $\beta_{2a}$  subunit.** Exemplary traces and time courses of ventricular whole-cell  $\text{Ca}^{2+}$  currents reveal a clear-cut increase of peak current following application of 8-Br-cAMP (1mM) and okadaic acid (1 $\mu$ M) in wild-type (**a, b**) myocytes. This effect was blunted in cardiomyocytes from mice overexpressing the cardiac  $\beta_2$ -subunit ( $\text{tg}_{\text{ind}} \beta_{2a}$ ; **d, e**). Current increase was statistically significant in case of wild-type (n=6) but not  $\text{tg}_{\text{ind}} \beta_{2a}$  myocytes (n=5) (**c, f**).

**Tab. S1: Sequences of primers used for quantitative real-time PCR.**

Abbreviations: s - sense primer, as - antisense primer, bp - base pairs.

| Gene                                              | Gene symbol     | Primer [5' → 3']                                       | Product size (bp) |
|---------------------------------------------------|-----------------|--------------------------------------------------------|-------------------|
| $\beta$ -actin                                    | <i>Actb</i>     | s: TCCATCATGAAGTGTGACGT<br>as: GAGCAATGATCTTGATCTTCAT  | 154               |
| S29                                               | <i>Rps29</i>    | s: ATGGGTACCAGCAGCTCTA<br>as: AGCCTATGTCCTTCGCGTACT    | 155               |
| atrial natriuretic peptide                        | <i>Nppa</i>     | s: GCTTCCAGGCCATATTGGAG<br>as: GGGGGCATGACCTCATCTT     | 126               |
| Connective tissue growth factor                   | <i>Ctgf</i>     | s: TGACCCCTGCGACCCACA<br>as: TACACCGACCCACCGAAGACACAG  | 117               |
| $\alpha_2\delta_1$ -subunit                       | <i>Cacna2d1</i> | s: ATGGTCCAGATCCTTGCGA<br>as: CACCACAGTCAGTATAATCCT    | 102               |
| $\alpha_2\delta_2$ -subunit                       | <i>Cacna2d2</i> | s: CAGCTGCGTCATGAAACAGA<br>as: TTGGTCAGTCTCTGCGCAT     | 114               |
| $\beta_1$ -subunit                                | <i>Cacnb1</i>   | s: TGGACAGCCTTCGTCTGCT<br>as: TGGAAGTGGAGTTGTCACCT     | 75                |
| $\beta_2$ -subunit (isoform 1)                    | <i>Cacnb2</i>   | s: ATGGAAGCACATCGTCAGACACT<br>as: CCTGCCGCTCAGCTTCTCTA | 141               |
| $\beta_2$ -subunit (isoform 2) + rat $\beta_{2a}$ | <i>Cacnb2</i>   | s: TGCCACCTCTTCATGCAGTG<br>as: CCTGCCGCTCAGCTTCTCTA    | 155               |
| $\beta_2$ -subunit (isoform 3)                    | <i>Cacnb2</i>   | s: GAAGGCTGAAGAGTTCCGGACAT<br>as: CCTGCCGCTCAGCTTCTCTA | 121               |
| $\beta_3$ -subunit                                | <i>Cacnb3</i>   | s: TGGAGTCAACTTTGAGGCCA<br>as: TCCCGATCCACCAGTCATTG    | 71                |
| murine $\text{Ca}_v1.2$ -subunit                  | <i>Cacna1c</i>  | s: TCCGAACATTACAACCAGCCT<br>as: GCTGTACATCTTCAGGAGCA   | 105               |
| human $\text{Ca}_v1.2$ -subunit                   | <i>Cacna1c</i>  | s: CACACCAGAAATGACAGACA<br>as: ATTCATGTTGGCGTGATTAT    | 95                |

**Tab. S2: mRNA expression of endogenous murine Ca<sup>2+</sup>-channel  $\beta$ - or Ca<sub>v</sub>1.2- subunits in the heart of wild-type or transgenic mice.**

| gene                              | gene symbol    | wild-type | tg <sub>ind</sub> $\beta_{2a}$ | p-value  | tg Ca <sub>v</sub> 1.2 | tg <sub>ind</sub> $\beta_{2a}$<br>x tg Ca <sub>v</sub> 1.2 | p-value  |
|-----------------------------------|----------------|-----------|--------------------------------|----------|------------------------|------------------------------------------------------------|----------|
| $\beta_1$ -subunit                | <i>Cacnb1</i>  | 100 ± 17  | 82 ± 12                        | p = 0.56 | 100 ± 13               | 95 ± 5                                                     | p = 0.71 |
| $\beta_2$ -subunit<br>(isoform 1) | <i>Cacnb2</i>  | 100 ± 13  | 116 ± 21                       | p = 0.51 | 100 ± 13               | 109 ± 6                                                    | p = 0.52 |
| $\beta_2$ -subunit<br>(isoform 3) | <i>Cacnb2</i>  | 100 ± 13  | 112 ± 22                       | p = 0.85 | 100 ± 10               | 106 ± 19                                                   | p = 1.00 |
| $\beta_3$ -subunit                | <i>Cacnb3</i>  | 100 ± 19  | 85 ± 16                        | p = 0.56 | 100 ± 23               | 84 ± 9                                                     | p = 0.51 |
| Ca <sub>v</sub> 1.2-<br>subunit   | <i>Cacna1c</i> | 100 ± 14  | 96 ± 17                        | p = 0.86 | 100 ± 12               | 100 ± 10                                                   | p = 1.00 |

**Figure S1**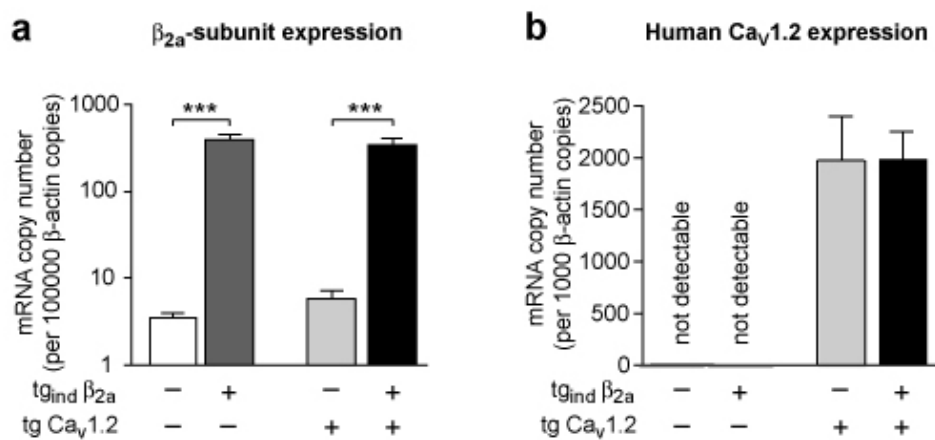

Figure S2

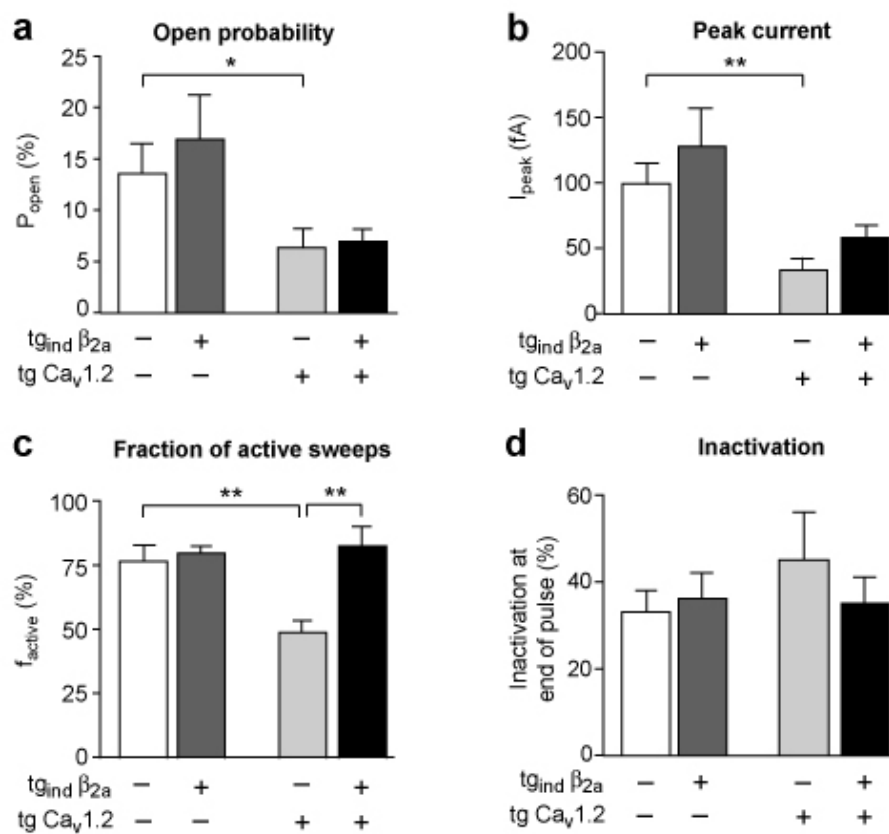

Figure S3

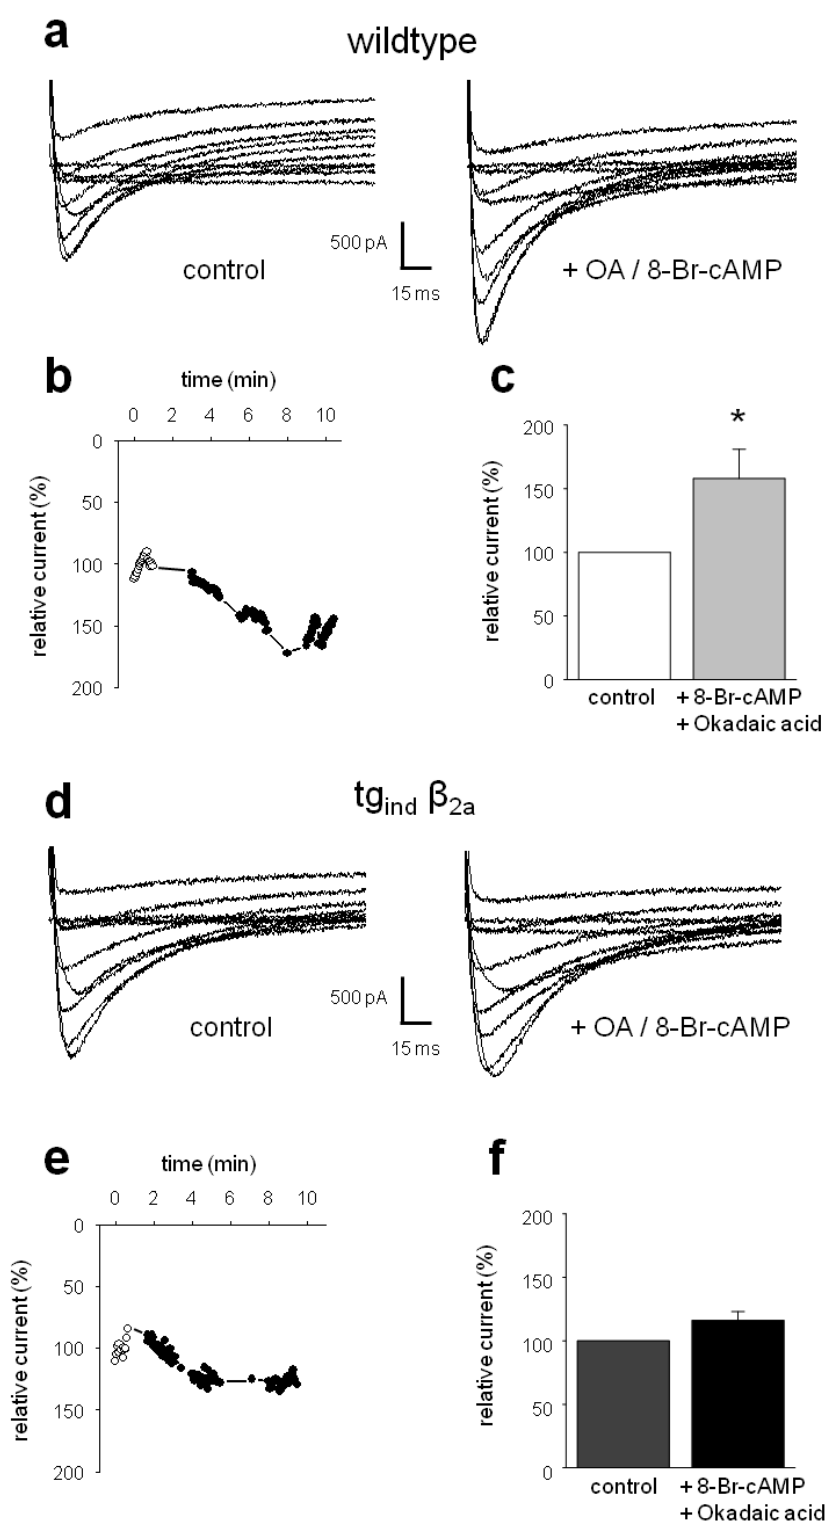

Supplement: cvp251_1.pdf [file cvp251_1.pdf]
